# Supplementary material for: Impact of multiwall carbon nanotubes on the accumulation and distribution of carbamazepine in collard greens (Brassica oleracea)
Source: Royal Society of Chemistry journal article supplement (doi:10.1039/c6en00419a), 2016-11-30
Supplement: c6en00419a1.pdf [file c6en00419a1.pdf]

## Supporting Information

### Adsorption experiment method

To assess the carbamazepine and CNTs interactions without *B. oleracea*, the containers were replaced with well-sealed 80 ml glass bottles. In 80-ml jars, the nutrient solution was initially mixed with 100 µg/L carbamazepine and 50 mg/L CNTs. The aqueous phase was sampled at 2, 6, 12, 16, 24, 72 and 144 h. Similarly, to assess the effect of plant presence on carbamazepine-CNTs interactions, another group of 80 ml glass bottles were planted with seedlings. Though nutrient solution consumption of *B. oleracea* was negligible in first 24 h, the volume was monitored by weighing the containers every 8 h and the containers were restored to initial conditions with distilled water. The aqueous phase in the presence of plants was sampled at the intervals mentioned above.

Table S1. The bioconcentration factors (BCF)<sup>a</sup> and transfer factors (TF) of carbamazepine in *B. oleracea* with co-exposure of additional carbon materials.

| Treatment             | Hydroponics     |                  |       | Soil           |      |      |
|-----------------------|-----------------|------------------|-------|----------------|------|------|
|                       | TF <sup>b</sup> | Root             | Leaf  | TF             | Root | Leaf |
|                       | (root to leaf)  | BCF <sup>b</sup> | BCF   | (root to leaf) | BCF  | BCF  |
| carbamazepine only    | 24.43 (31.24)   | 0.86 (0.67)      | 20.99 | 8.74           | 0.26 | 2.25 |
| pCNTs + carbamazepine | 2.49 (12.83)    | 6.62 (1.28)      | 16.48 | 8.49           | 0.19 | 1.65 |
| cCNTs + carbamazepine | 3.47 (14.13)    | 3.54 (0.87)      | 12.29 | 11.70          | 0.16 | 1.89 |
| AC + carbamazepine    | 0.24            | 6.05             | 1.48  | 7.67           | 0.07 | 0.53 |

<sup>a</sup> Bioaccumulation factor was calculated based on the ratio of relative uptake of carbamazepine in plant tissues to the concentration of carbamazepine fortified in exposure media.

<sup>b</sup> Values in brackets were corrected based on the concentrations in surfactant-washed root.

Table S2 carbamazepine bioaccumulation in absolute amount ( $\mu\text{g}$ ) in soil-grown *B. oleracea* tissues.

| Treatment             | Leaf Content       | Root Content      | Total Content      |
|-----------------------|--------------------|-------------------|--------------------|
| carbamazepine only    | 18.77 $\pm$ 2.88 A | 0.90 $\pm$ 0.19 A | 19.55 $\pm$ 3.11 A |
| pCNTs + carbamazepine | 12.57 $\pm$ 3.30 B | 0.64 $\pm$ 0.14 B | 14.10 $\pm$ 2.48 B |
| cCNTs + carbamazepine | 13.45 $\pm$ 1.42 B | 0.42 $\pm$ 0.16 C | 13.86 $\pm$ 1.53 B |
| AC + carbamazepine    | 2.75 $\pm$ 0.44 C  | 0.10 $\pm$ 0.01 D | 2.86 $\pm$ 0.44 C  |
